# Supplementary material
Source: PubMed Central journal article supplement (PMC7560263)
Supplement: mmc1.pdf [file mmc1.pdf]

**Supplementary Table 1.** KRT patients diagnosed with COVID-19 up to May 1<sup>st</sup> 2020, as percentage of prevalent KRT patients on 31 December 2017, by treatment modality and country

|                                                                        | Dialysis |     |     |         |                                   |        |         |       |             |                 | Transplant |        |       |
|------------------------------------------------------------------------|----------|-----|-----|---------|-----------------------------------|--------|---------|-------|-------------|-----------------|------------|--------|-------|
|                                                                        | All      | HD  | PD  | Austria | French-speaking part of Belgium * | France | Romania | Spain | Switzerland | the Netherlands | All        | France | Spain |
| <b>Patients with COVID-19 as % of prevalent patients on 31/12/2017</b> | 2.9      | 3.0 | 1.3 | 1.0     | 3.7                               | 3.4    | 1.4     | 3.5   | 2.4         | 2.2             | 1.4        | 1.3    | 1.6   |
| <b>Age at diagnosis</b>                                                |          |     |     |         |                                   |        |         |       |             |                 |            |        |       |
| 0-19, %                                                                | 2.0      | 2.6 | 0.7 | 0.0     | NA                                | 1.4    | 1.0     | 6.0   | 0.0         | 0.0             | 0.7        | 0.6    | 1.0   |
| 20-44, %                                                               | 2.4      | 2.5 | 1.1 | 0.6     | 4.0                               | 3.4    | 1.2     | 2.2   | 2.4         | 1.3             | 0.9        | 1.0    | 0.9   |
| 45-64, %                                                               | 2.6      | 2.7 | 1.2 | 0.7     | 4.2                               | 3.2    | 1.6     | 2.8   | 2.2         | 2.0             | 1.5        | 1.4    | 1.5   |
| 65-74, %                                                               | 2.9      | 3.0 | 1.4 | 1.2     | 3.2                               | 3.4    | 1.5     | 3.4   | 1.6         | 2.2             | 1.5        | 1.3    | 1.9   |
| 75+, %                                                                 | 3.3      | 3.4 | 1.6 | 1.2     | 3.7                               | 3.6    | 0.9     | 4.4   | 3.1         | 2.5             | 1.9        | 1.6    | 2.2   |
| <b>Sex</b>                                                             |          |     |     |         |                                   |        |         |       |             |                 |            |        |       |
| Males, %                                                               | 3.0      | 3.1 | 1.5 | 0.8     | 4.1                               | 3.6    | 1.3     | 3.5   | 2.4         | 2.1             | 1.5        | 1.4    | 1.6   |
| Females, %                                                             | 2.7      | 2.9 | 1.1 | 1.3     | 3.0                               | 3.1    | 1.4     | 3.5   | 2.2         | 2.3             | 1.3        | 1.2    | 1.5   |
| <b>Primary renal disease</b>                                           |          |     |     |         |                                   |        |         |       |             |                 |            |        |       |
| Glomerulonephritis, %                                                  | 2.4      | 2.5 | 1.1 | 1.1     | 2.9                               | 2.9    | 1.5     | 2.7   | 1.2         | 1.3             | 1.2        | 1.2    | 1.3   |
| Diabetes, %                                                            | 3.6      | 3.7 | 1.5 | 1.2     | 4.9                               | 4.0    | 2.5     | 3.6   | 3.1         | 2.6             | 2.0        | 2.0    | 2.0   |
| Hypertension / renal vascular disease, %                               | 3.3      | 3.5 | 1.4 | 0.8     | 3.1                               | 3.7    | 4.0     | 3.1   | 3.3         | 2.5             | 1.8        | 2.0    | 1.4   |
| Other, %                                                               | 2.6      | 2.8 | 1.3 | 0.9     | 3.6                               | 3.1    | 0.9     | 4.1   | 2.0         | 2.1             | 1.4        | 1.1    | 1.7   |
| <b>Treatment modality</b>                                              |          |     |     |         |                                   |        |         |       |             |                 |            |        |       |
| HD, %                                                                  | 3.0      | NA  | NA  | 1.0     | 3.8                               | 3.5    | 1.5     | 3.8   | 2.5         | 2.2             | NA         | NA     | NA    |
| PD, %                                                                  | 1.3      | NA  | NA  | 0.3     | 2.4                               | 1.5    | 0.0     | 1.6   | 1.2         | 2.2             | NA         | NA     | NA    |

Abbreviations used: HD: hemodialysis, PD: peritoneal dialysis, NA: not applicable

\* Data on patients younger than 20 years are not available

**Supplementary Table 2.** Prevalent KRT patients on 31 December 2017, by treatment modality and country

|                                              | Dialysis         |                  |                  |                  |                                  |                  |                  |                  |                  |                  | Transplant       |                  |                  |
|----------------------------------------------|------------------|------------------|------------------|------------------|----------------------------------|------------------|------------------|------------------|------------------|------------------|------------------|------------------|------------------|
|                                              | All dialysis     | HD               | PD               | Austria          | French-speaking part of Belgium* | France           | Romania          | Spain            | Switzerland      | the Netherlands  | All transplant   | France           | Spain            |
| <b>Number of patients</b>                    | 113594           | 104202           | 9392             | 4548             | 3771                             | 47897            | 19823            | 27629            | 3679             | 6247             | 71861            | 39680            | 32181            |
| <b>Age at 31/12/2017, median (IQR)</b>       | 69.6 (58.6-79.1) | 69.8 (59.0-79.3) | 67.2 (55.0-77.2) | 68.6 (57.8-77.0) | 71.4 (61.1-80.3)                 | 71.0 (60.2-80.6) | 65.0 (54.2-73.8) | 70.7 (59-79.8)   | 70.9 (59.5-79.3) | 71.0 (59.6-79)   | 58.1 (47.5-67.6) | 57.8 (46.6-67.2) | 58.9 (48.7-68.5) |
| 0-19, n (%)                                  | 447 (0.4)        | 312 (0.3)        | 135 (1.4)        | 16 (0.4)         | 0 (0)                            | 217 (0.5)        | 104 (0.5)        | 83 (0.3)         | 13 (0.4)         | 14 (0.2)         | 1124 (1.6)       | 705 (1.8)        | 419 (1.3)        |
| 20-44, n (%)                                 | 9502 (8.4)       | 8552 (8.2)       | 950 (10.1)       | 358 (7.9)        | 276 (7.3)                        | 3731 (7.8)       | 2254 (11.4)      | 2121 (7.7)       | 288 (7.8)        | 474 (7.6)        | 13606 (18.9)     | 8131 (20.5)      | 5475 (17.0)      |
| 45-64, n (%)                                 | 33158 (29.2)     | 30047 (28.8)     | 3111 (33.1)      | 1496 (32.9)      | 984 (26.1)                       | 12529 (26.2)     | 7578 (38.2)      | 7832 (28.3)      | 1001 (27.2)      | 1738 (27.8)      | 34042 (47.4)     | 18602 (46.9)     | 15440 (48.0)     |
| 65-74, n (%)                                 | 30037 (26.4)     | 27592 (26.5)     | 2445 (26.0)      | 1236 (27.2)      | 1052 (27.9)                      | 12541 (26.2)     | 5435 (27.4)      | 7108 (25.7)      | 1000 (27.2)      | 1665 (26.7)      | 16819 (23.4)     | 9056 (22.8)      | 7763 (24.1)      |
| 75+, n (%)                                   | 40449 (35.6)     | 37698 (36.2)     | 2751 (29.3)      | 1442 (31.7)      | 1459 (38.7)                      | 18879 (39.4)     | 4452 (22.5)      | 10484 (37.9)     | 1377 (37.4)      | 2356 (37.7)      | 6270 (8.7)       | 3186 (8.0)       | 3084 (9.6)       |
| <b>Sex</b>                                   |                  |                  |                  |                  |                                  |                  |                  |                  |                  |                  |                  |                  |                  |
| Males, n (%)                                 | 69515 (61.2)     | 63898 (61.3)     | 5617 (59.8)      | 2989 (65.7)      | 2347 (62.2)                      | 29123 (60.8)     | 11109 (56.0)     | 17823 (64.5)     | 2341 (63.6)      | 3783 (60.6)      | 44854 (62.4)     | 24557 (61.9)     | 20297 (63.1)     |
| Females, n (%)                               | 44079 (38.8)     | 40304 (38.7)     | 3775 (40.2)      | 1559 (34.3)      | 1424 (37.8)                      | 18774 (39.2)     | 8714 (44.0)      | 9806 (35.5)      | 1338 (36.4)      | 2464 (39.4)      | 27007 (37.6)     | 15123 (38.1)     | 11884 (36.9)     |
| <b>Primary renal disease</b>                 |                  |                  |                  |                  |                                  |                  |                  |                  |                  |                  |                  |                  |                  |
| Glomerulonephritis, n (%)                    | 16180 (14.2)     | 14589 (14.0)     | 1591 (16.9)      | 634 (13.9)       | 410 (10.9)                       | 6822 (14.2)      | 3148 (15.9)      | 3861 (14.0)      | 598 (16.3)       | 707 (11.3)       | 18695 (26.0)     | 11020 (27.8)     | 7675 (23.8)      |
| Diabetes, n (%)                              | 23622 (20.8)     | 21921 (21.0)     | 1701 (18.1)      | 1179 (25.9)      | 900 (23.9)                       | 11100 (23.2)     | 2125 (10.7)      | 6225 (22.5)      | 750 (20.4)       | 1343 (21.5)      | 6386 (8.9)       | 3292 (8.3)       | 3094 (9.6)       |
| Hypertension / renal vascular disease, n (%) | 20969 (18.5)     | 19241 (18.5)     | 1728 (18.4)      | 1017 (22.4)      | 849 (22.5)                       | 11680 (24.4)     | 1212 (6.1)       | 3700 (13.4)      | 807 (21.9)       | 1704 (27.3)      | 5962 (8.3)       | 3567 (9.0)       | 2395 (7.4)       |
| Other, n (%)                                 | 51848 (45.6)     | 47544 (45.6)     | 4304 (45.8)      | 1718 (37.8)      | 1612 (42.7)                      | 18295 (38.2)     | 13337 (67.3)     | 12885 (46.6)     | 1524 (41.4)      | 2477 (39.7)      | 39435 (54.9)     | 21801 (54.9)     | 17634 (54.8)     |
| <b>Treatment modality</b>                    |                  |                  |                  |                  |                                  |                  |                  |                  |                  |                  |                  |                  |                  |
| HD, n (%)                                    | 104202 (91.7)    | NA               | NA               | 4189 (92.1)      | 3483 (92.4)                      | 44809 (93.6)     | 18490 (93.3)     | 24522 (88.8)     | 3339 (90.8)      | 5370 (86.0)      | NA               | NA               | NA               |
| PD, n (%)                                    | 9392 (8.3)       | NA               | NA               | 359 (7.9)        | 288 (7.6)                        | 3088 (6.4)       | 1333 (6.7)       | 3107 (11.2)      | 340 (9.2)        | 877 (14.0)       | NA               | NA               | NA               |
| <b>Year of start KRT, median (IQR)</b>       | 2014 (2010-2016) | 2014 (2010-2016) | 2015 (2013-2017) | 2015 (2012-2016) | 2015 (2011-2016)                 | 2014 (2011-2016) | 2013 (2009-2016) | 2014 (2010-2016) | 2014 (2011-2016) | 2015 (2012-2016) | 2007 (2000-2012) | 2007 (1999-2012) | 2007 (2000-2012) |

Abbreviations used: HD: hemodialysis, PD: peritoneal dialysis, IQR: interquartile range, KRT: kidney replacement therapy, NA: not applicable

\* Data on patients younger than 20 years are not available

**Supplementary Table 3.** Comparison of COVID-19 patients and propensity score matched controls without COVID-19

|                                              | Dialysis         |                  |         | Transplant       |                  |         |
|----------------------------------------------|------------------|------------------|---------|------------------|------------------|---------|
|                                              | COVID            | non-COVID        | p-value | COVID            | non-COVID        | p-value |
|                                              | n=3285           | n=32850          |         | n=1013           | n=10130          |         |
| <b>Age</b>                                   |                  |                  |         |                  |                  |         |
| Mean (SD)                                    | 69.4 (14.8)      | 69.3 (14.6)      | 0.81    | 59.6 (13.4)      | 59.4 (13.7)      | 0.73    |
| Median (IQR)                                 | 71.7 (60.6-80.5) | 71.7 (60.8-80.6) | 0.70    | 60.9 (51.1-69.4) | 61.1 (50.7-69.6) | 0.88    |
| <b>Sex</b>                                   |                  |                  |         |                  |                  |         |
| Males, n (%)                                 | 2077 (63.2)      | 20680 (63.0)     | 0.76    | 662 (65.4)       | 6650 (65.7)      | 0.86    |
| <b>Primary renal disease</b>                 |                  |                  | 0.90    |                  |                  | 0.65    |
| Diabetes, n (%)                              | 839 (25.5)       | 8351 (25.4)      |         | 130 (12.8)       | 1410 (13.9)      |         |
| Hypertension / renal vascular disease, n (%) | 695 (21.2)       | 6966 (21.2)      |         | 107 (10.6)       | 1134 (11.2)      |         |
| Glomerulonephritis, n (%)                    | 381 (11.6)       | 3951 (12.0)      |         | 224 (22.1)       | 2239 (22.1)      |         |
| Other, n (%)                                 | 1370 (41.7)      | 13582 (41.4)     |         | 552 (54.5)       | 5347 (52.8)      |         |
| <b>KRT vintage in years, median (IQR)</b>    | 3 (2-6)          | 3 (1-6)          | 0.76    | 9 (4-15)         | 9 (4-15)         | 0.46    |
| <b>Country</b>                               |                  |                  | <0.001  |                  |                  | 0.60    |
| Austria, n (%)                               | 44 (1.3)         | 422 (1.3)        |         | NA               | NA               |         |
| Belgium, n (%)                               | 140 (4.3)        | 1913 (5.8)       |         | NA               | NA               |         |
| Switzerland, n (%)                           | 87 (2.7)         | 392 (1.2)        |         | NA               | NA               |         |
| Spain, n (%)                                 | 976 (29.7)       | 9666 (29.4)      |         | 501 (49.5)       | 4919 (48.6)      |         |
| France, n (%)                                | 1631 (49.7)      | 16438 (50.0)     |         | 512 (50.5)       | 5211 (51.4)      |         |
| the Netherlands, n (%)                       | 137 (4.2)        | 1421 (4.3)       |         | NA               | NA               |         |
| Romania, n (%)                               | 270 (8.2)        | 2598 (7.9)       |         | NA               | NA               |         |

Abbreviations used: HD: hemodialysis, PD: peritoneal dialysis, SD: standard deviation, IQR: interquartile range, KRT: kidney replacement therapy, NA: not applicable

**Supplementary Table 4.** Comparison of transplant and propensity score matched dialysis COVID-19 patients

|                                              | <b>Dialysis</b>  | <b>Transplant</b> | <b>p-value</b> |
|----------------------------------------------|------------------|-------------------|----------------|
|                                              | n=787            | n=787             |                |
| <b>Age at COVID-19 diagnosis</b>             |                  |                   |                |
| Mean (SD)                                    | 60.1 (16.1)      | 61.6 (13.1)       | 0.04           |
| Median (IQR)                                 | 61.9 (49.9-72.4) | 63.1 (54.1-71.3)  | 0.14           |
| <b>Sex</b>                                   |                  |                   |                |
| Males, n (%)                                 | 499 (63.4)       | 502 (63.8)        | 0.92           |
| <b>Primary renal disease</b>                 |                  |                   | 0.94           |
| Diabetes, n (%)                              | 123 (15.6)       | 123 (15.6)        |                |
| Hypertension / renal vascular disease, n (%) | 88 (11.2)        | 96 (12.2)         |                |
| Glomerulonephritis, n (%)                    | 157 (20.0)       | 153 (19.4)        |                |
| Other, n (%)                                 | 419 (53.2)       | 415 (52.7)        |                |
| <b>KRT vintage in years, median (IQR)</b>    | 5 (2-11)         | 7 (3-13)          | <0.001         |
| <b>Country</b>                               |                  |                   | 0.16           |
| Spain, n (%)                                 | 406 (51.6)       | 377 (47.9)        |                |
| France, n (%)                                | 381 (48.4)       | 410 (52.1)        |                |

Abbreviations used: HD: hemodialysis, PD: peritoneal dialysis, SD: standard deviation, IQR: interquartile range, KRT: kidney replacement therapy

**Supplementary Table 5.** COVID-19 attributable mortality for dialysis and transplant patients with COVID-19

|                                       | COVID-19 attributable mortality(95% CI) |                  |
|---------------------------------------|-----------------------------------------|------------------|
|                                       | Dialysis                                | Transplant       |
| <b>All</b>                            | 20.0 (18.7-21.4)                        | 19.9 (17.5-22.5) |
| <b>Age at COVID-19 diagnosis</b>      |                                         |                  |
| 0-64 years                            | 8.3 (6.8-10.1)                          | 11.8 (9.5-14.7)  |
| 65-74 years                           | 19.5 (17.1-22.3)                        | 28.7 (23.6-34.6) |
| 75+ years                             | 29.6 (27.3-32.0)                        | 43.5 (35.3-52.5) |
| <b>Sex</b>                            |                                         |                  |
| Female                                | 17.9 (15.9-20.1)                        | 22.0 (17.9-26.7) |
| Male                                  | 21.3 (19.7-23.1)                        | 18.8 (16.0-22.0) |
| <b>Primary renal disease</b>          |                                         |                  |
| Diabetes                              | 19.2 (16.8-22.0)                        | 30.4 (22.9-39.4) |
| Glomerulonephritis                    | 15.8 (12.5-19.8)                        | 16.2 (11.9-21.8) |
| Hypertension / renal vascular disease | 23.0 (20.1-26.2)                        | 27.6 (20.0-37.1) |
| Other                                 | 20.1 (18.1-22.3)                        | 17.6 (14.7-21.0) |
| <b>Treatment modality</b>             |                                         |                  |
| HD                                    | 19.9 (18.5-21.2)                        | NA               |
| PD                                    | 23.8 (17.5-31.9)                        | NA               |
| <b>Country</b>                        |                                         |                  |
| Austria                               | 23.0 (13.6-36.7)                        | NA               |
| Belgium (French-speaking part)        | 20.0 (14.3-27.6)                        | NA               |
| France                                | 16.4 (14.8-18.3)                        | 16.5 (13.5-20.1) |
| Romania                               | 7.6 (4.6-12.2)                          | NA               |
| Spain                                 | 26.7 (24.1-29.5)                        | 23.0 (19.5-26.9) |
| Switzerland                           | 27.3 (19.4-37.3)                        | NA               |
| the Netherlands                       | 28.1 (21.6-36.0)                        | NA               |

*Abbreviations used: HD: hemodialysis, PD: peritoneal dialysis, CI: confidence interval, NA: not applicable  
Propensity score matching was performed separately within the subgroups*

**Supplementary Figure 1.** Probability of death among age and sex matched dialysis and transplant patients with COVID-19

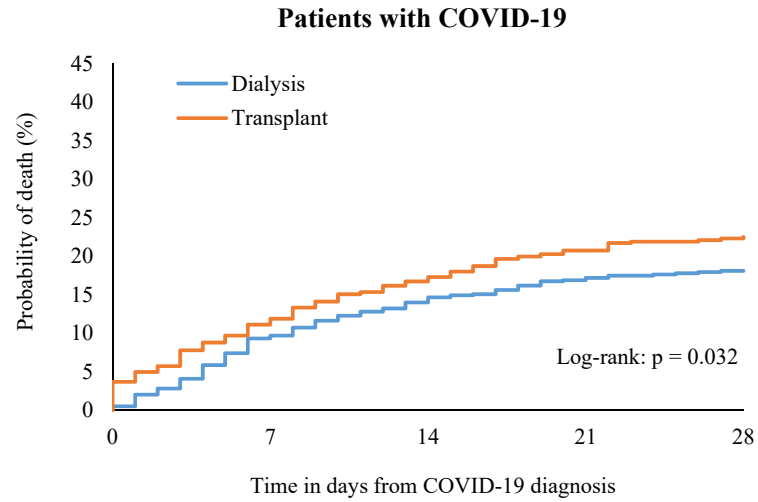

**Dialysis**

|                                |             |                |                  |                  |                  |
|--------------------------------|-------------|----------------|------------------|------------------|------------------|
| N patients / deaths / censored | 787 / 0 / 0 | 706 / 76 / 5   | 641 / 114 / 32   | 580 / 132 / 75   | 502 / 138 / 147  |
| Probability of death (95% CI)  |             | 9.7 (7.8-12.0) | 14.7 (12.4-17.3) | 17.2 (14.7-20.0) | 18.1 (15.5-21.0) |

**Transplant**

|                                |             |                 |                  |                  |                  |
|--------------------------------|-------------|-----------------|------------------|------------------|------------------|
| N patients / deaths / censored | 787 / 0 / 0 | 684 / 93 / 10   | 584 / 133 / 70   | 500 / 156 / 131  | 377 / 166 / 244  |
| Probability of death (95% CI)  |             | 11.9 (9.8-14.4) | 17.3 (14.8-20.2) | 20.7 (18.0-23.8) | 22.5 (19.6-25.7) |

**HR Transplant:**

|               |                  |
|---------------|------------------|
| First 28 days | 1.28 (1.02-1.60) |
| First 14 days | 1.21 (0.95-1.56) |
| Last 14 days  | 1.60 (0.94-2.70) |

*Including data from France and Spain*

**Supplementary Figure 2.** Probability of death among dialysis patients (left panel) and transplant patients (right panel) with COVID-19, by age group

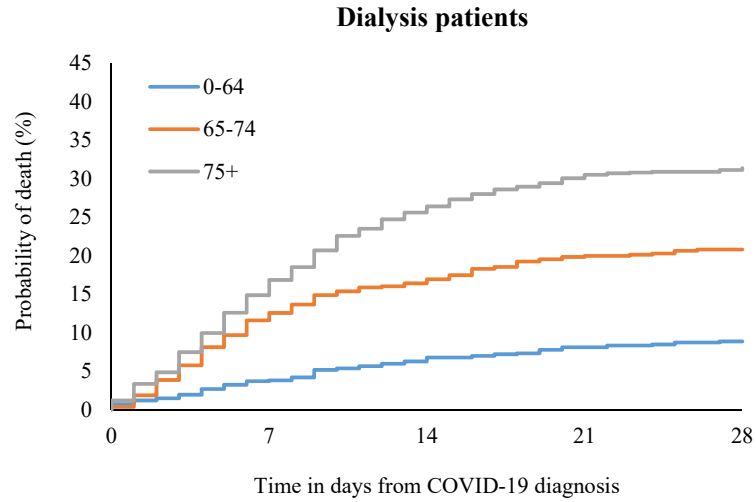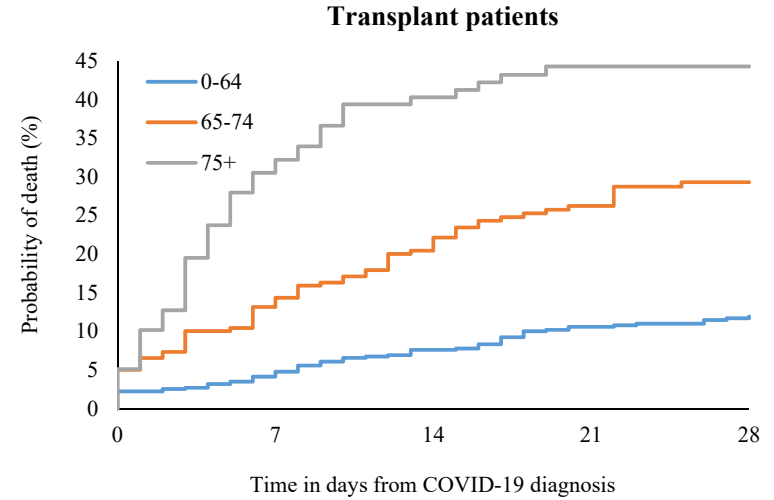

**0-64 years**

N patients / deaths / censored 1088 / 0 / 0 1023 / 41 / 24 913 / 71 / 104 807 / 83 / 198 676 / 89 / 325

Probability of death (95% CI) 3.8 (2.8-5.1) 6.8 (5.4-8.5) 8.1 (6.6-10.0) 8.9 (7.2-10.8)

**65-74 years**

N patients / deaths / censored 857 / 0 / 0 727 / 106 / 24 631 / 141 / 85 545 / 163 / 149 443 / 168 / 246

Probability of death (95% CI) 12.6 (10.5-15.0) 16.9 (14.5-19.7) 20.0 (17.4-22.9) 20.8 (18.1-23.8)

**75+ years**

N patients / deaths / censored 1340 / 0 / 0 1094 / 224 / 22 904 / 346 / 90 750 / 393 / 197 565 / 401 / 374

Probability of death (95% CI) 16.8 (14.9-19.0) 26.4 (24.1-28.9) 30.5 (28.0-33.1) 31.4 (28.9-34.0)

635 / 0 / 0 595 / 30 / 10 536 / 47 / 52 464 / 63 / 108 366 / 69 / 200

Probability of death (95% CI) 4.8 (3.4-6.7) 7.6 (5.8-10.0) 10.6 (8.4-13.3) 11.9 (9.5-14.9)

260 / 0 / 0 219 / 37 / 4 183 / 56 / 21 151 / 65 / 44 121 / 71 / 68

Probability of death (95% CI) 14.3 (10.6-19.2) 22.1 (17.5-27.8) 26.2 (21.2-32.2) 29.3 (23.9-35.6)

118 / 0 / 0 80 / 38 / 0 65 / 47 / 6 51 / 51 / 16 51 / 51 / 16

Probability of death (95% CI) 32.2 (24.6-41.4) 40.3 (32.0-49.8) 44.3 (35.7-53.9) 44.3 (35.7-53.9)

**Supplementary Figure 3.** Probability of death among dialysis patients (left panel) and transplant patients (right panel) with COVID-19, by sex

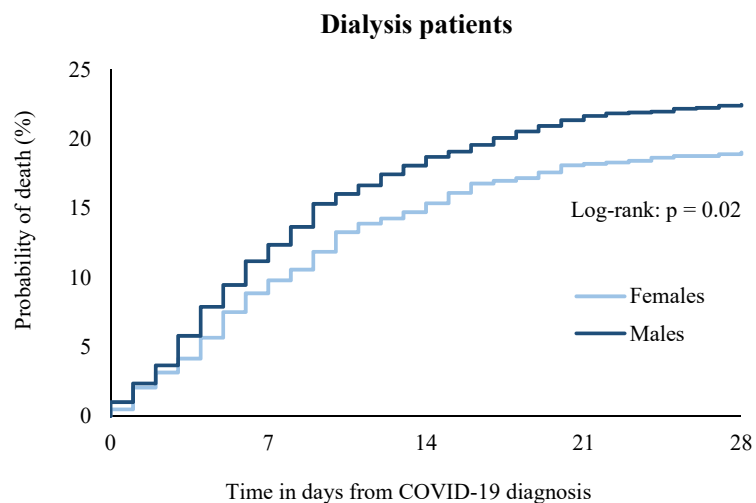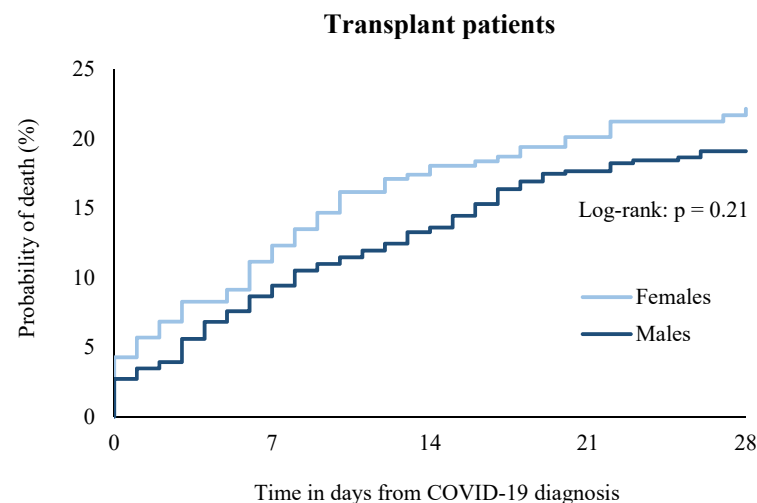

**Females**

|                                |              |                 |                  |                  |                  |
|--------------------------------|--------------|-----------------|------------------|------------------|------------------|
| N patients / deaths / censored | 1208 / 0 / 0 | 1063 / 117 / 28 | 916 / 180 / 112  | 787 / 209 / 212  | 606 / 216 / 386  |
| Probability of death (95% CI)  |              | 9.8 (8.2-11.6)  | 15.4 (13.4-17.6) | 18.2 (16.1-20.6) | 19.0 (16.8-21.5) |

**Males**

|                                |              |                  |                  |                  |                  |
|--------------------------------|--------------|------------------|------------------|------------------|------------------|
| N patients / deaths / censored | 2077 / 0 / 0 | 1781 / 254 / 42  | 1532 / 378 / 167 | 1304 / 430 / 343 | 1031 / 442 / 604 |
| Probability of death (95% CI)  |              | 12.4 (11.0-13.9) | 18.7 (17.1-20.5) | 21.7 (19.9-23.5) | 22.5 (20.7-24.4) |

|                                |             |                 |                  |                  |                  |
|--------------------------------|-------------|-----------------|------------------|------------------|------------------|
| N patients / deaths / censored | 351 / 0 / 0 | 304 / 43 / 4    | 260 / 62 / 29    | 223 / 68 / 60    | 169 / 73 / 109   |
| Probability of death (95% CI)  |             | 12.3 (9.3-16.2) | 18.0 (14.4-22.5) | 20.1 (16.2-24.8) | 22.2 (18.0-27.1) |

|                                |             |                |                  |                  |                  |
|--------------------------------|-------------|----------------|------------------|------------------|------------------|
| N patients / deaths / censored | 662 / 0 / 0 | 590 / 62 / 10  | 518 / 88 / 56    | 443 / 111 / 108  | 362 / 118 / 182  |
| Probability of death (95% CI)  |             | 9.4 (7.4-11.9) | 13.6 (11.2-16.5) | 17.7 (14.9-20.9) | 19.1 (16.2-22.5) |



**Supplementary Figure 4.** Probability of death among dialysis patients (left panel) and transplant patients (right panel) with COVID-19, by primary renal disease

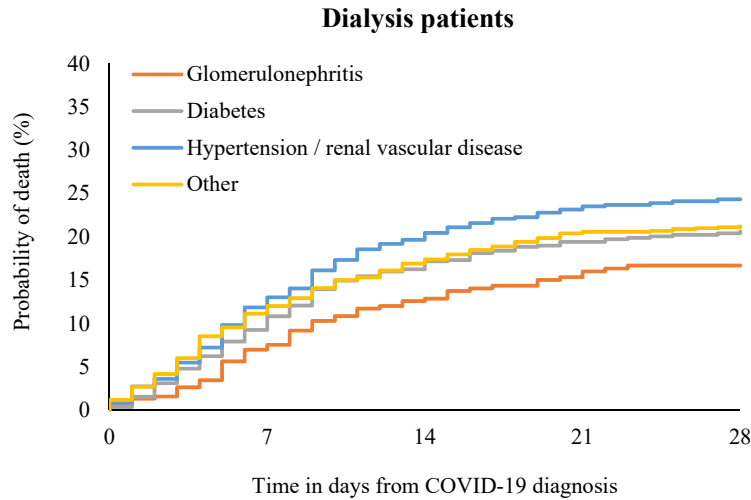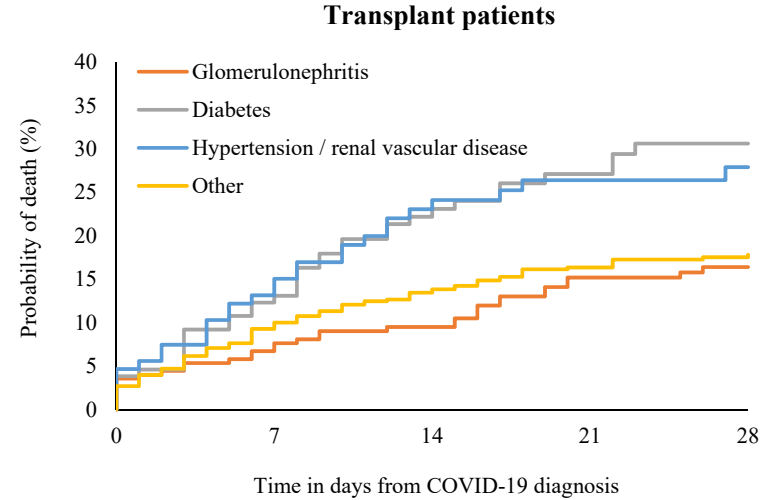

**Glomerulonephritis**

|                                |             |                |                 |                  |                  |
|--------------------------------|-------------|----------------|-----------------|------------------|------------------|
| N patients / deaths / censored | 381 / 0 / 0 | 338 / 28 / 15  | 299 / 47 / 35   | 256 / 57 / 68    | 240 / 59 / 82    |
| Probability of death (95% CI)  |             | 7.5 (5.3-10.7) | 12.9 (9.8-16.8) | 16.0 (12.6-20.3) | 16.7 (13.2-21.0) |

**Diabetes**

|                                |             |                 |                  |                  |                  |
|--------------------------------|-------------|-----------------|------------------|------------------|------------------|
| N patients / deaths / censored | 839 / 0 / 0 | 733 / 90 / 16   | 625 / 140 / 74   | 550 / 156 / 133  | 417 / 163 / 259  |
| Probability of death (95% CI)  |             | 10.8 (8.9-13.1) | 17.2 (14.7-19.9) | 19.4 (16.8-22.3) | 20.6 (17.9-23.6) |

**Hypertension / renal vascular disease**

|                                |             |                  |                  |                  |                  |
|--------------------------------|-------------|------------------|------------------|------------------|------------------|
| N patients / deaths / censored | 695 / 0 / 0 | 596 / 90 / 9     | 500 / 139 / 56   | 421 / 157 / 117  | 338 / 161 / 196  |
| Probability of death (95% CI)  |             | 13.0 (10.7-15.8) | 20.4 (17.6-23.7) | 23.5 (20.5-26.9) | 24.3 (21.2-27.8) |

**Other**

|                                |              |                  |                  |                  |                  |
|--------------------------------|--------------|------------------|------------------|------------------|------------------|
| N patients / deaths / censored | 1370 / 0 / 0 | 1177 / 163 / 30  | 1024 / 232 / 114 | 876 / 269 / 225  | 695 / 275 / 400  |
| Probability of death (95% CI)  |              | 12.0 (10.4-13.9) | 17.4 (15.5-19.5) | 20.6 (18.5-22.9) | 21.2 (19.1-23.6) |

|                                |             |                |                |                  |                  |
|--------------------------------|-------------|----------------|----------------|------------------|------------------|
| N patients / deaths / censored | 224 / 0 / 0 | 202 / 17 / 5   | 186 / 21 / 17  | 156 / 32 / 36    | 134 / 34 / 56    |
| Probability of death (95% CI)  |             | 7.6 (4.8-12.0) | 9.5 (6.3-14.2) | 15.2 (11.0-20.8) | 16.4 (12.0-22.3) |

|                                |             |                 |                  |                  |                  |
|--------------------------------|-------------|-----------------|------------------|------------------|------------------|
| N patients / deaths / censored | 130 / 0 / 0 | 112 / 17 / 1    | 86 / 29 / 15     | 68 / 33 / 29     | 58 / 36 / 36     |
| Probability of death (95% CI)  |             | 13.1 (8.4-20.2) | 23.1 (16.6-31.5) | 27.1 (20.0-36.1) | 30.6 (23.0-40.1) |

|                                |             |                 |                  |                  |                  |
|--------------------------------|-------------|-----------------|------------------|------------------|------------------|
| N patients / deaths / censored | 107 / 0 / 0 | 89 / 16 / 2     | 72 / 25 / 10     | 64 / 27 / 16     | 48 / 28 / 31     |
| Probability of death (95% CI)  |             | 15.1 (9.5-23.4) | 24.1 (17.0-33.6) | 26.4 (18.9-36.2) | 27.9 (20.1-38.0) |

|                                |             |                 |                  |                  |                  |
|--------------------------------|-------------|-----------------|------------------|------------------|------------------|
| N patients / deaths / censored | 552 / 0 / 0 | 491 / 55 / 6    | 435 / 75 / 42    | 381 / 87 / 84    | 292 / 93 / 167   |
| Probability of death (95% CI)  |             | 10.0 (7.8-12.9) | 13.9 (11.2-17.1) | 16.4 (13.5-19.8) | 17.8 (14.8-21.4) |
